# Supplementary material for: Is job strain associated with a higher risk of type 2 diabetes mellitus? A systematic review and meta-analysis of prospective cohort studies
Source: PubMed Central journal article supplement (PMC8091067; doi:10.5271/sjweh.3938), 2021-04-27
Supplement: SJWEH-47-249-S001.pdf [file SJWEH-47-249-S001.pdf]

## Is job strain associated with a higher risk of type 2 diabetes mellitus? A systematic review and meta-analysis of prospective cohort studies<sup>1</sup>

by Wenzhen Li, MD, Guilin Yi, MS, Zhenlong Chen, MS, Xiayun Dai, MD, Jie Wu, MS, Ying Peng, MS, Wenyu Ruan, BS, Zuxun Lu, MD, Dongming Wang, MD<sup>2</sup>

1. *Supplementary material*

2. *Correspondence to: Dongming Wang, Department of Occupational & Environmental Health, School of Public Health, Tongji Medical College, Huazhong University of Science and Technology, Wuhan, Hubei 430030, China. [E-mail: 648283002@qq.com]*

**Table S1 Quality assessment of included studies using the Newcastle-Ottawa Scale**

| Study<br>(year of publication) | Selection<br>process of<br>cohorts | Comparability<br>of cohorts | Identification of the<br>exposure and the<br>outcomes of study<br>participants | total<br>score |
|--------------------------------|------------------------------------|-----------------------------|--------------------------------------------------------------------------------|----------------|
| Miriam Mutambudzi(2016)        | 3                                  | 2                           | 2                                                                              | 7              |
| Cornelia Huth(2014)            | 4                                  | 2                           | 3                                                                              | 9              |
| Solja T. Nyberg(2014)          | 4                                  | 1                           | 2                                                                              | 7              |
| Norito Kawakami(1999)          | 3                                  | 1                           | 3                                                                              | 7              |
| Alexandros Heraclides(2009)    | 3                                  | 2                           | 3                                                                              | 8              |
| Candyce H. Kroenke(2006)       | 3                                  | 2                           | 3                                                                              | 8              |
| M. Norberg(2007)               | 4                                  | 2                           | 2                                                                              | 8              |
| Anna-Karin Eriksson(2013)      | 4                                  | 2                           | 3                                                                              | 9              |
| K.-Y. Pan(2017)                | 3                                  | 2                           | 2                                                                              | 7              |
| Chie Kaneto(2013)              | 4                                  | 2                           | 1                                                                              | 7              |

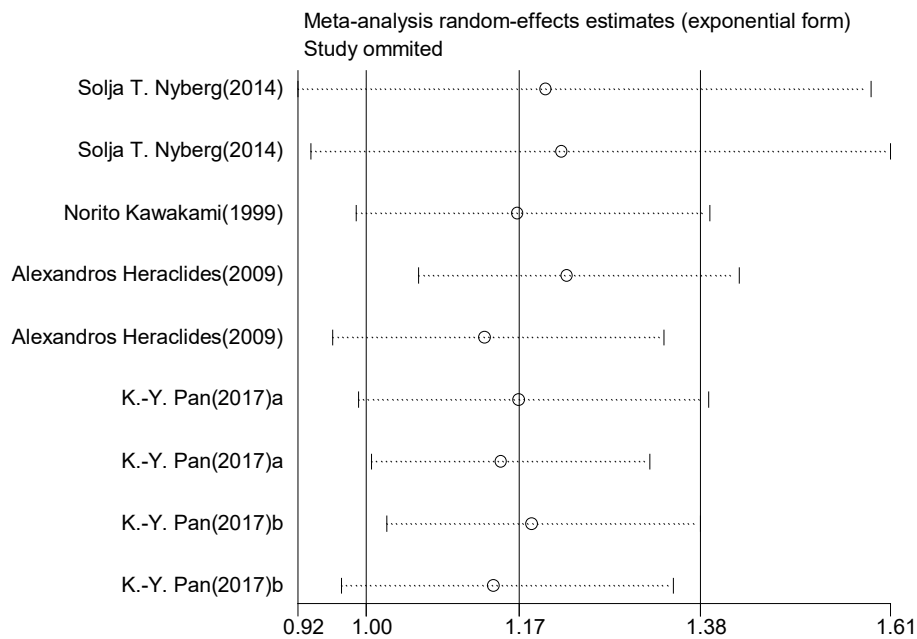

**Figure S1(A) Sensitivity analyses for studies of high job strain with T2DM risk**

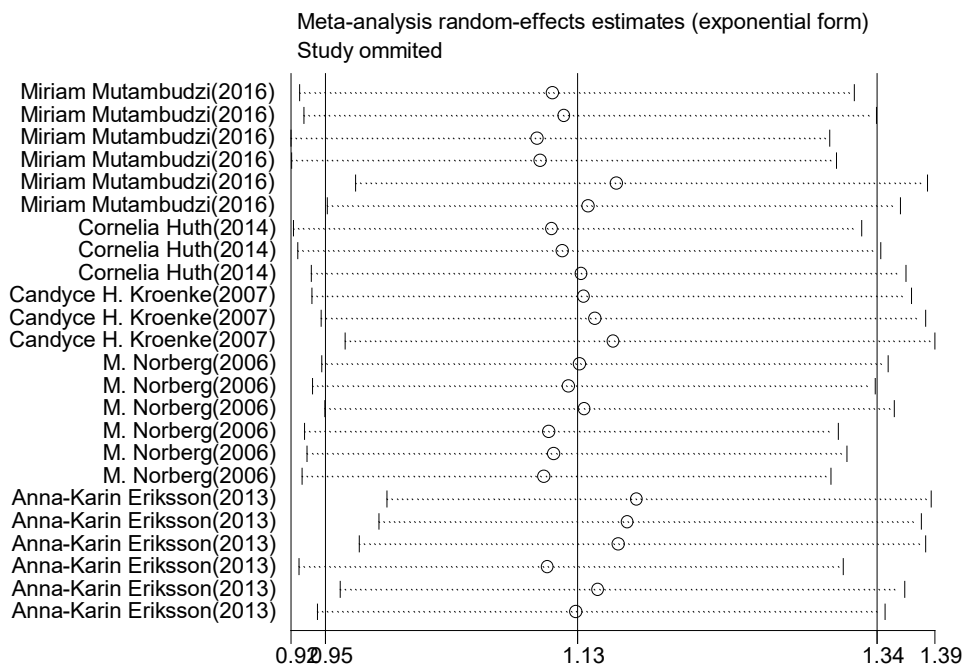

**Figure S1(B) Sensitivity analyses for studies of job strain model quadrants with T2DM risk**

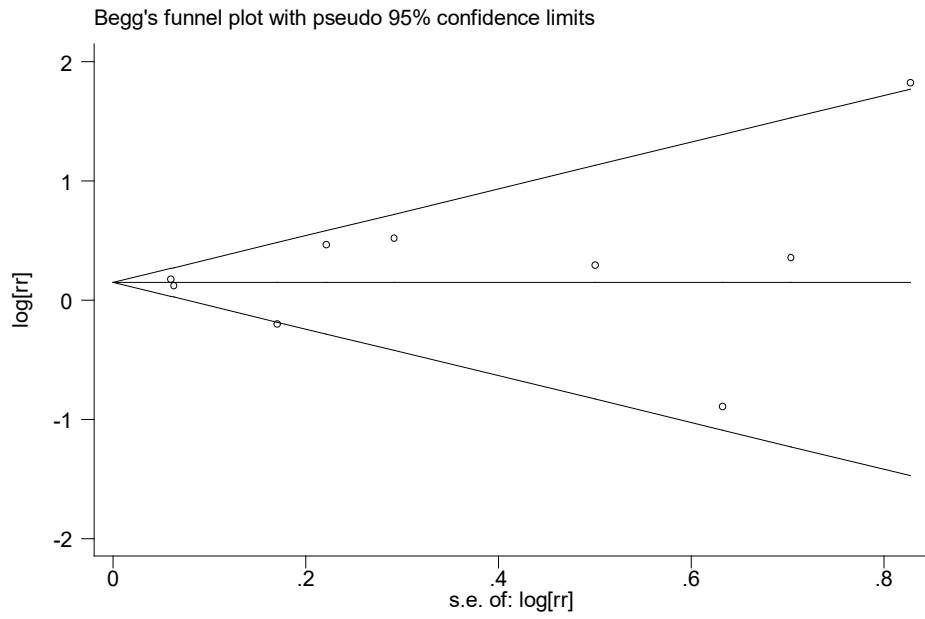

**Figure S2(A) Funnel plot for studies of high job strain in relation to T2DM risk**

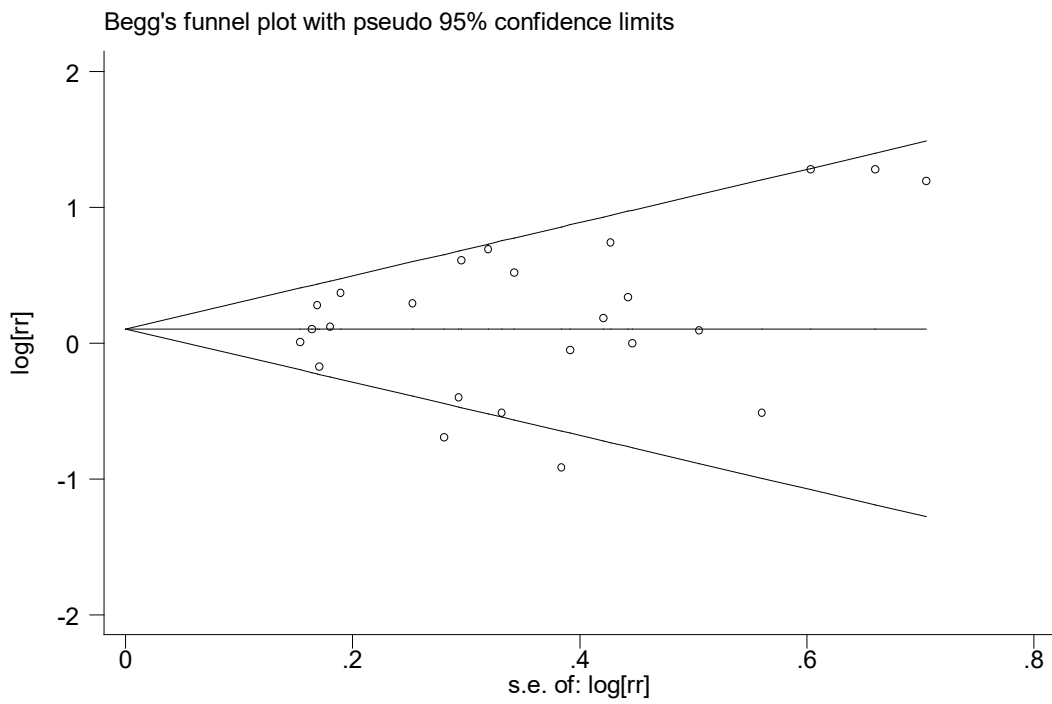

**Figure S2(B) Funnel plot for studies of job strain model quadrants in relation to T2DM risk**
